# Supplementary material for: Molecular epidemiology of Avian Rotaviruses Group A and D shed by different bird species in Nigeria
Source: PubMed Central journal article supplement (PMC5469043; doi:10.1186/s12985-017-0778-5), 2017-06-12
Supplement: 12985_2017_778_MOESM2_ESM.pdf [file 12985_2017_778_MOESM2_ESM.pdf]

1 Additional File 2: Best-fit models of nucleotide substitution that were selected for each  
 2 phylogenetic analysis using JModeltest (<http://jmodeltest.org/user/dashboard>).

| Phylogenetic analyses of:                     | Alignment length | nucleotide substitution model selected | Figure in manuscript   |
|-----------------------------------------------|------------------|----------------------------------------|------------------------|
| VP6 gene of Rotavirus D                       | 888              | HKY + G                                | Figure 1               |
| VP7 gene of Rotavirus D                       | 637              | HKY + G                                | Figure 1               |
| NSP4 gene of Rotavirus A                      | 529              | HKY + G                                | Figure 2               |
| VP4 gene of Rotavirus A                       | 424              | GTR + G                                | Figure 3               |
| VP6 gene of Rotavirus A                       | 1098             | HKY + I + G                            | Figure 3               |
| VP7 gene of Rotavirus A                       | 699              | GTR + I + G                            | Figure 3               |
| NSP4 gene of Rotavirus A, all study sequences | 529              | HKY + G                                | Supplementary Figure 1 |
| VP4 gene of Rotavirus A, all study sequences  | 424              | GTR + G                                | Supplementary Figure 2 |
| VP6 gene of Rotavirus A, all study sequences  | 1098             | HKY + I + G                            | Supplementary Figure 3 |
| VP7 gene of Rotavirus A, all study sequences  | 699              | GTR + I + G                            | Supplementary Figure 4 |

3
