# Supplementary material for: Molecular epidemiology of Avian Rotaviruses Group A and D shed by different bird species in Nigeria
Source: PubMed Central journal article supplement (PMC5469043; doi:10.1186/s12985-017-0778-5), 2017-06-12
Supplement: 12985_2017_778_MOESM6_ESM.pdf [file 12985_2017_778_MOESM6_ESM.pdf]

1 Additional File 6

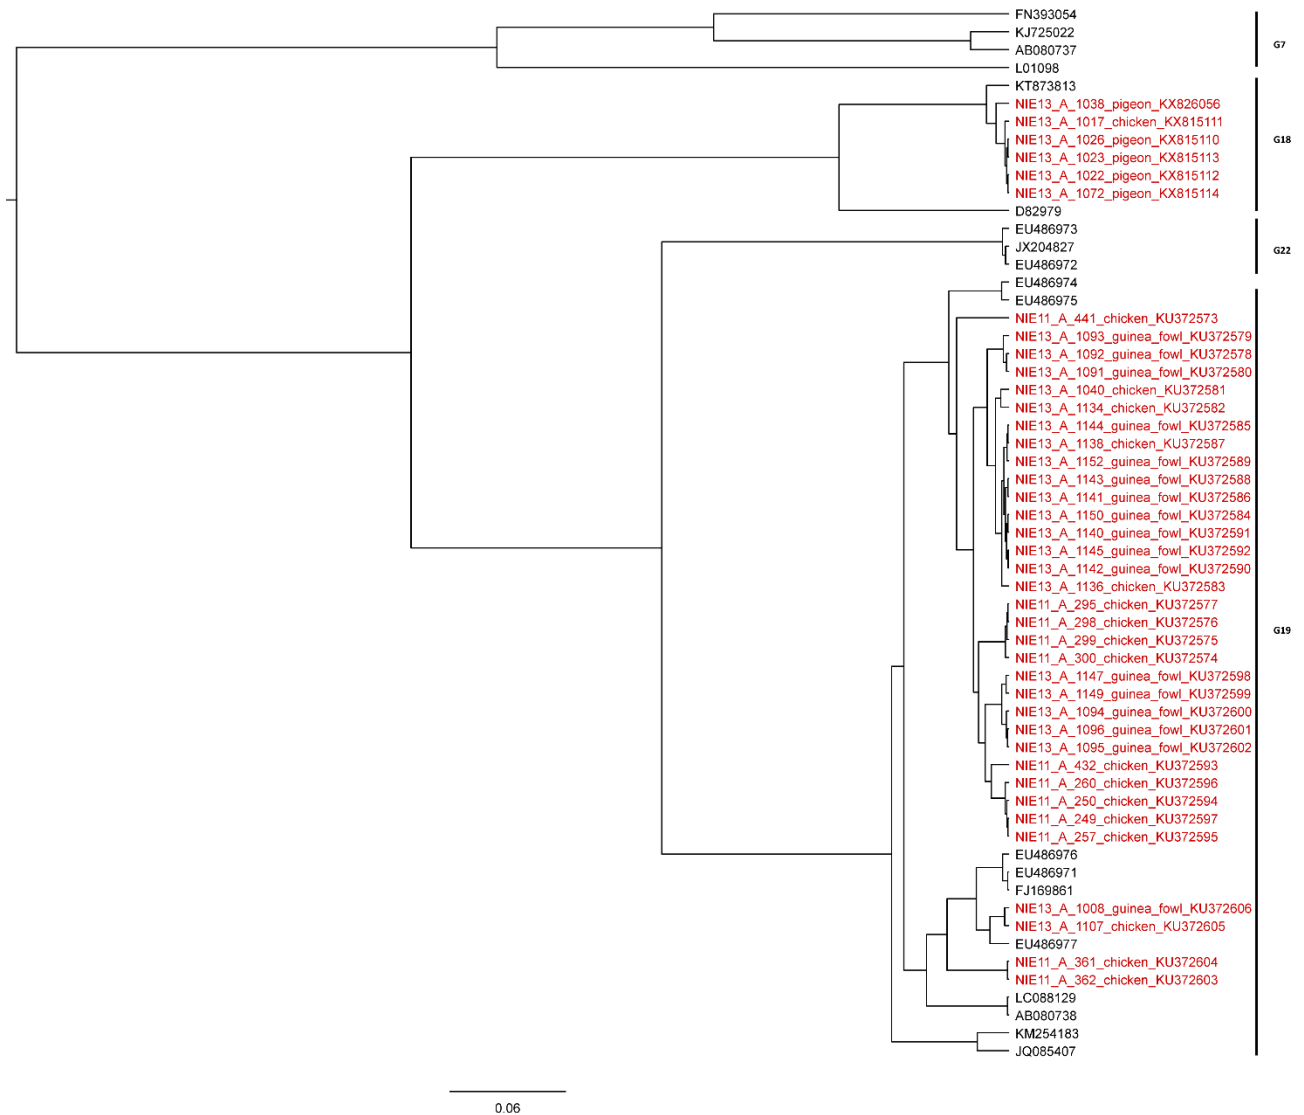

2

3 **Maximum clade credibility tree of partial VP7 gene sequences of Rotavirus group A**

4 **(RVA).** Bayesian analyses of alignments (699 bp) comprising sequences of all available

5 VP7 sequences that are available in Genbank

6 (<http://www.ncbi.nlm.nih.gov/Genbank/index.html>), as well as all long sequences identified

7 in this study. Tree topology was tested by posterior probability (pp) and only the well

8 supported values are shown (pp>0.7). The RVA strains are represented by their GenBank

9 accession numbers and study sequences are in red. Genotypes were assigned using the

10 nucleotide cut-off values defined before (1).

11 References

- 12 1. **Matthijnssens J, Ciarlet M, McDonald SM, Attoui H, Banyai K, Brister JR,**  
13 **Buesa J, Esona MD, Estes MK, Gentsch JR, Iturriza-Gomara M, Johne R,**  
14 **Kirkwood CD, Martella V, Mertens PP, Nakagomi O, Parreno V, Rahman M,**  
15 **Ruggeri FM, Saif LJ, Santos N, Steyer A, Taniguchi K, Patton JT, Desselberger**  
16 **U, Van Ranst M.** 2011. Uniformity of rotavirus strain nomenclature proposed by the  
17 Rotavirus Classification Working Group (RCWG). *Arch Virol* **156**:1397-1413.

18
