# Supplementary material for: Molecular epidemiology of Avian Rotaviruses Group A and D shed by different bird species in Nigeria
Source: Springer Nature journal article supplement (doi:10.1186/s12985-017-0778-5), 2017-06-12
Supplement: MOESM1 [file 12358754]

1 Additional File 1: Primers used for the detection of avian group A and D rotaviruses by  
 2 real-time RT-PCR and for amplification of segments of VP4, VP6, VP7 and NSP4 for  
 3 sequencing.

| Rotavirus group   | Target segment | Target gene | Primer sense | Primer sequence (5'-3')   | Amplicon size (bp) | Reference  |
|-------------------|----------------|-------------|--------------|---------------------------|--------------------|------------|
| <b>Detection</b>  |                |             |              |                           |                    |            |
| Rotavirus A       | Seg 6          | VP6         | F            | GAGCAACTATTGATTACTTCATTGA | 114                | (1)        |
|                   |                |             | R            | AAAGTTGCCTTARTGCATTAGA    |                    |            |
|                   |                |             | Probe        | d                         |                    |            |
| Rotavirus D       | Seg 6          | VP6         | F            | GCGACAACTGAGACAACTG       | 186                | (1)        |
|                   |                |             | R            | GGAAGCAGTTGTCATCAAC       |                    |            |
|                   |                |             | Probe        | d                         |                    |            |
| <b>Sequencing</b> |                |             |              |                           |                    |            |
| Rotavirus A       | Seg 10         | NSP4        | F            | GTGCGGAAAGATGGAGAAC       | 630                | (2)        |
|                   |                |             | R            | GTTGGGGTACCAGGGATTAA      |                    |            |
|                   | Seg 6          | VP6         | F            | CGAAGTCTTCATCATGGAT       | 420                | this study |
|                   |                |             | R            | RCCTGTRCGTTGYCTTCTGTT     |                    |            |
|                   | Seg 6          | VP6         | F            | GTAATGGAATWGCDCCNCAATC    | 777                | (3)        |
|                   |                |             | R            | ATACCTGSWGAAAWACTGGTCC    |                    |            |
|                   | Seg 6          | VP6         | F            | GCAGCACCATTTCCWAATCAT     | 353                | this study |
|                   |                |             | R            | GGTCACATCCTCTCACTATA      |                    |            |
|                   | Seg 9          | VP7         | F            | GAATGGCTAGCTCATATGTT      | 487                | this study |
|                   |                |             | R            | TGTCTGAGTATTTARTGGGCATA   |                    |            |
|                   | Seg 9          | VP7         | F            | CAGACTTCAGAGGCTAATAA      | 378                | this study |
|                   |                |             | R            | GCGCGATCTTCTAGACATA       |                    |            |
|                   | Seg 9          | VP7         | F            | GCTAATTCGCCCACTCTTTGC     | this study         |            |
|                   |                |             | R            | CCCTGCCCAATTGCTATCCAT     |                    |            |

|             |       |     |   |                              |                |
|-------------|-------|-----|---|------------------------------|----------------|
|             | Seg 9 | VP7 | F | GAATGGAAAAGCACGGTGGC         | this study     |
|             |       |     | R | GCACTCGCGTTAAGTGATCG         |                |
|             | Seg 4 | VP4 | F | GGCTATAAAATGGCTTCDCTC        | 645 this study |
|             |       |     | R | TGWATTGGAGGYAGACCATT         |                |
|             | Seg 4 | VP4 | F | GAACAGTGCCAAATGTRCAA         | 733 this study |
|             |       |     | R | CGAATGATGGCTCACCAA           |                |
|             | Seg 4 | VP4 | F | GCTGGTAAATTATATGCATATAG      | 524 this study |
|             |       |     | R | TGCTTGTGAATCATCCCAGTA        |                |
|             | Seg 4 | VP4 | F | AGACAACCTTCTAGCAAAYTCRTACACT | 512 this study |
|             |       |     | R | CCATGATATACRTACAACCKTCCTTG   |                |
|             | Seg 4 | VP4 | F | ATGCTTTYATGAAAGAYCAAGGA      | 690 this study |
|             |       |     | R | CATTTGTGGCCATKGYCCAA         |                |
|             | Seg 4 | VP4 | F | ATGTACGATCGCTAARTGCAGAA      | 780 this study |
|             |       |     | R | TCCACCTTCAGTCTGYGTWGC        |                |
|             | Seg 4 | VP4 | F | GACATTGCCACDCAAACWTCA        | 450 this study |
|             |       |     | R | AATCTTTCAGCACWCKTGGRTC       |                |
| Rotavirus D | Seg 6 | VP6 | F | CCAACGTRTCAGATGTRAT          | 491 this study |
|             |       |     | R | GCTGYCCACGAACAAAGTCYT        |                |
|             | Seg 6 | VP6 | F | CTACTGGTGGATTGGCTACTA        | 362 this study |
|             |       |     | R | GCAAATCKKGTTCCTGAYACATT      |                |
|             | Seg 6 | VP6 | F | GAATTYCAACTTGCAGGACAA        | 485 this study |
|             |       |     | R | CTGCTGACGTATGATAACAGATT      |                |
|             | Seg 6 | VP6 | F | GCTGGAAATCCATCAGCWA          | 322 this study |
|             |       |     | R | GCAGATATTACTIONCCGCATT       |                |
|             | Seg 6 | VP6 | F | GGCTCTAAGTACATTTCAGAATGG     | 740 this study |
|             |       |     | R | CCAGGAGGGAAAACCTGGTCC        |                |
|             | Seg 9 | VP7 | F | GGAGTGACGCACCTGTATGA         | 552 this study |
|             |       |     | R | GCGTTTGTTGATTCAATGGGC        |                |
|             | Seg 9 | VP7 | F | CATCAATGGATGAAATAATAACAGG    | 372 this study |
|             |       |     | R | AGCGACATTRGTTCTCTCGCTC       |                |

5 References

- 6 1. **Otto PH, Ahmed MU, Hotzel H, Machnowska P, Reetz J, Roth B, Trojnar E,**  
7 **Johne R.** 2012. Detection of avian rotaviruses of groups A, D, F and G in diseased  
8 chickens and turkeys from Europe and Bangladesh. *Vet Microbiol* **156**:8-15.
- 9 2. **Pantin-Jackwood MJ, Day JM, Jackwood MW, Spackman E.** 2008. Enteric  
10 viruses detected by molecular methods in commercial chicken and turkey flocks in  
11 the United States between 2005 and 2006. *Avian Dis* **52**:235-244.
- 12 3. **Schumann T, Hotzel H, Otto P, Johne R.** 2009. Evidence of interspecies  
13 transmission and reassortment among avian group A rotaviruses. *Virology* **386**:334-  
14 343.
- 15
