# Supplementary material for: Molecular epidemiology of Avian Rotaviruses Group A and D shed by different bird species in Nigeria
Source: Springer Nature journal article supplement (doi:10.1186/s12985-017-0778-5), 2017-06-12
Supplement: MOESM5 [file 12358754]

1 Additional File 5

2

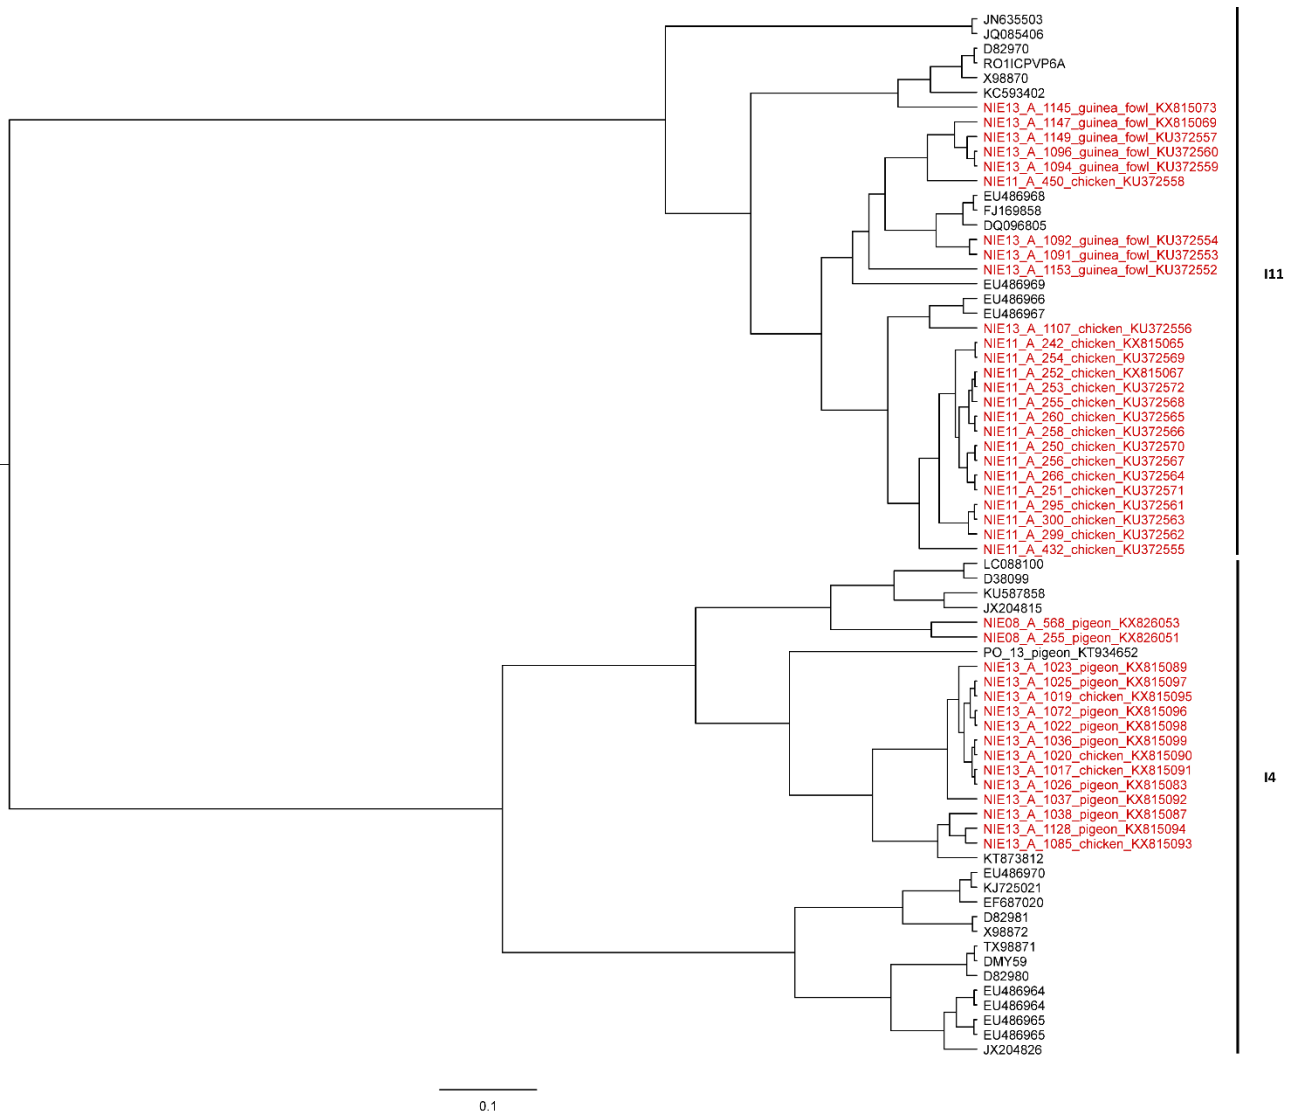

3

4 **Maximum clade credibility tree of partial VP6 gene sequences of Rotavirus group A**

5 **(RVA).** Bayesian analyses of alignments (1098 bp) comprising sequences of all available

6 VP6 sequences that are available in Genbank

7 (<http://www.ncbi.nlm.nih.gov/Genbank/index.html>), as well as all long sequences identified

8 in this study. Tree topology was tested by posterior probability (pp) and only the well

9 supported values are shown (pp>0.7). The RVA strains are represented by their GenBank

10 accession numbers and study sequences are in red. Genotypes were assigned using the

11 nucleotide cut-off values defined before (1)

12   References

- 13   1.   **Matthijnssens J, Ciarlet M, McDonald SM, Attoui H, Banyai K, Brister JR,**  
14   **Buesa J, Esona MD, Estes MK, Gentsch JR, Iturriza-Gomara M, Johne R,**  
15   **Kirkwood CD, Martella V, Mertens PP, Nakagomi O, Parreno V, Rahman M,**  
16   **Ruggeri FM, Saif LJ, Santos N, Steyer A, Taniguchi K, Patton JT, Desselberger**  
17   **U, Van Ranst M.** 2011. Uniformity of rotavirus strain nomenclature proposed by the  
18   Rotavirus Classification Working Group (RCWG). *Arch Virol* **156**:1397-1413.

19
